# Supplementary material for: Breeding Polyommatus icarus Serves as a Large-Scale and Environmentally Friendly Source of Precisely Tuned Photonic Nanoarchitectures
Source: MDPI journal article supplement (doi:10.3390/insects14080716), 2023-08-18
Supplement: s1 [file s1]

## Supplementary Information

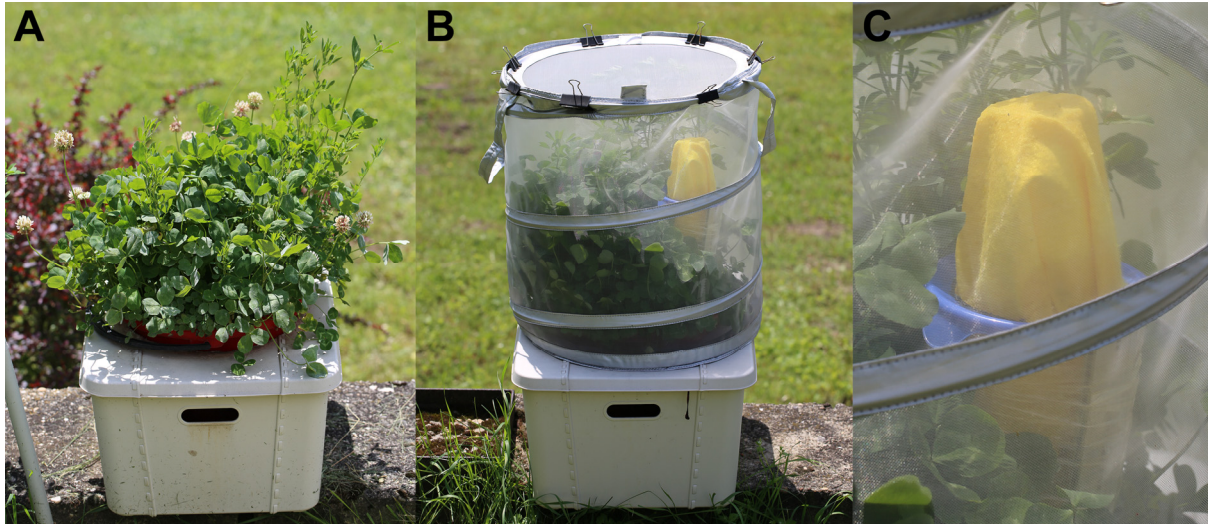

**Figure S1.** Outdoor breeding setup for Common Blue (*Polyommatus icarus*) butterflies. (A) Hostplants of the species *Trifolium repens*, *T. pratense* and *Medicago sativa* were cultivated. (B) These were covered with an openable net, (C) and a feeder was also included in the middle, which contained sugar water and mimicked the yellow color of the flowers of *Lotus corniculatus*.

**Video S1.** Timelapse video from the inside of the insectarium recorded from 11<sup>th</sup> December 2019 to 20<sup>th</sup> December 2019. Still photographs were taken every 10 minutes during the day and stitched together into a 30-fps video. The rapid growth of *Lotus corniculatus* and the flying imagines of newly hatched *Polyommatus icarus* can be seen.
